# Supplementary material for: Self-promoted solid-state covalent networking of Au25(SR)18 through reversible disulfide bonds. A critical effect of the nanocluster in oxidation processes
Source: Royal Society of Chemistry journal article supplement (doi:10.1039/d1nr01812d), 2021-01-01
Supplement: d1nr01812d1.pdf [file d1nr01812d1.pdf]

## Electronic Supplementary Information

### **Self-promoted solid-state covalent networking of Au<sub>25</sub>(SR)<sub>18</sub> through reversible disulfide bonds. A critical effect of the nanocluster in the oxidation processes**

Yuki Saito, Yukatsu Shichibu, Katsuaki Konishi\*

Graduate School of Environmental Science and Faculty of Environmental Earth Science, Hokkaido University, North 10 West 5, Sapporo 060-0810, Japan

## 1. General

Tetrachloroauric (III) acid tetrahydrate (>47.5% for gold) was purchased from TANAKA HOLDINGS Co., Ltd. 1,6-Hexanedithiol (>96%), tetraoctylammonium bromide (>97%), and sodium tetrahydroborate (powder, >95%) were purchased from FUJIFILM Wako Chemicals. Other standard chemicals and solvents were purchased from Kanto chemical and used as received. O<sub>2</sub> gas (>99 %) was purchased from AIR WATER. Visible absorption spectra were recorded on a JASCO V-670 or JASCO V-550 spectrometer at room temperature. Solid-state visible absorption spectra were recorded on a JASCO V-670 at room temperature. Fluorescence spectra were recorded on a JASCO FP-8600 spectrofluorometer and corrected by using rhodamine B and a JASCO ESC-842. Routine <sup>1</sup>H NMR spectra were collected at ambient temperature on a JEOL EX-400 NMR spectrometer, and the chemical shifts (in ppm) were referenced to residual CDHCl<sub>2</sub> ( $\delta = 5.30$ ). Dynamic light scattering (DLS) data were collected on a Malvern Nano-S light scattering system with a 633 nm He/Ne laser at 20 °C. Elemental analysis were performed using an Exeter Analytical CE440 elemental analyzer. Powder X-ray diffraction analysis was performed using a Bruker D8 Advance Diffractometer. Transmission electron microscopy (TEM) images were obtained by JEM-2000FX. Thermogravimetric analysis was performed on a Rigaku Thermo plus TG 8120 at a heating rate of 5 °C/min under air stream. Photoirradiation experiments were conducted on an ASAHI spectra LAX-103 system equipped with a 100 W Xe lamp source and a band-pass filter (520 nm).

## 2. Experimental procedures

### **As-synthesized Au<sub>25</sub> cluster (2) from 1,6-hexanedithiol**

In a 100 mL 2-necked round-bottomed flask containing H<sub>2</sub>AuCl<sub>4</sub>·4H<sub>2</sub>O (400 mg, 0.97 mmol) and tetraoctylammonium bromide (531 mg, 0.97 mmol) was added THF (25 mL) and the solution was stirred at room temperature for 15 min, and then was stirred at 0 °C for 15 min. 1,6-Hexanedithiol (430 μL, 2.91 mmol) was added to the mixture and the solution was stirred for 3 h at 0 °C. After the solution color was changed to colorless, ice cold aqueous solution of NaBH<sub>4</sub> (505 mg, 13.4 mmol/ 6.0 mL Milli-Q water) was added at once under vigorous stirring with the reaction solution kept at 0 °C. After the reaction mixture was stirred for 20 h at room temperature, the aqueous phase was removed by syringe and then the residual THF solution was treated with ice cold water (100 mL), which results in the precipitation of oily solids. After sonication for 3 min, the oily precipitates collected by decantation were washed with methanol (30 mL × 3) and dissolved in dichloromethane (20 mL). The resulting solution was filtered through a PTFE membrane filter (pore size: 0.2 μm) and the filtrate was concentrated and dried *in vacuo* to give **2** as dark brown sticky solids (261 mg, 27% based on Au).

### **Preparation of Au<sub>25</sub> Film (3)**

As-synthesized Au<sub>25</sub> cluster (**2**) (102 mg) dissolved in dichloromethane (DCM, 20 mL) was evaporated in a 100-mL round-bottomed flask (Figure S3a) and left under O<sub>2</sub> atmosphere for 20-24 h. DCM (15 mL) was added to the flask, where brown films were peeled off from the glass surface (b). The DCM layer was removed by centrifugation and the remaining solid was successively washed with DCM (5 mL × 3) and EtOH (5 mL × 3) and then dried *in vacuo* for 10 min to give **3** as thin curled films (c) (44 mg, 95% based on Au<sub>25</sub>).

### **Singlet-oxygen generation experiments**

To a methanol solution of 9,10-dimethylanthracene (DMA) (20 μM, 3 mL) was added **1** (2.1 mg,) or **3** (3.0 mg), each of which contains 2.7 μmol Au<sub>25</sub>. After the mixture was purged with O<sub>2</sub>, the solution was stirred for 30 min under the irradiation of 520-nm light from a 100W Xe lamp coupled with a band-path filter. The solution was centrifuged (10000 rpm, 5 min) and was subjected to the fluorescence measurements with an excitation of 360 nm. In the recycling experiments, the cluster films (**3**) collected by centrifugation were used for the next reaction batches after washing with methanol.

### 3. Scheme and Figures

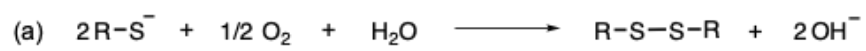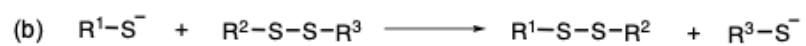

**Scheme S1.** (a) Thiolate oxidation and (b) thiolate-disulfide exchange reactions.

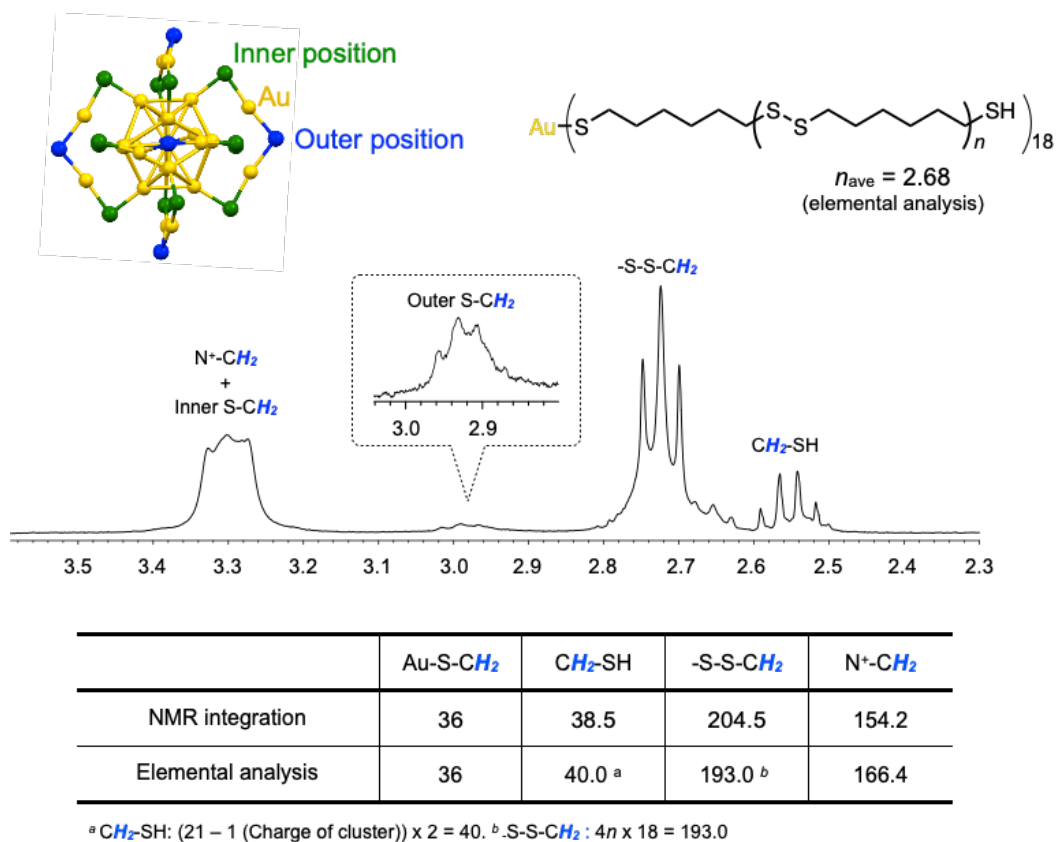

**Figure S1.** <sup>1</sup>H-NMR spectrum of as-synthesized Au<sub>25</sub> cluster (**2**) in the region of α-protons of thiolate, thiol, disulfide and TOA<sup>+</sup> (CD<sub>2</sub>Cl<sub>2</sub>, 400 MHz, 298 K). The quartet signal assignable to CH<sub>2</sub>SH may be due to the protonation of CH<sub>2</sub>S<sup>-</sup> with residual water. The table shows the numbers of the protons with respect to Au-SCH<sub>2</sub> (36H) estimated from the NMR integration and from the elemental-analysis chemical composition (Au<sub>25</sub>(S<sub>2</sub>C<sub>6</sub>H<sub>12</sub>)<sub>66</sub>(N(C<sub>8</sub>H<sub>17</sub>)<sub>4</sub>)<sub>21</sub>). The two results accord with each other within experimental errors.

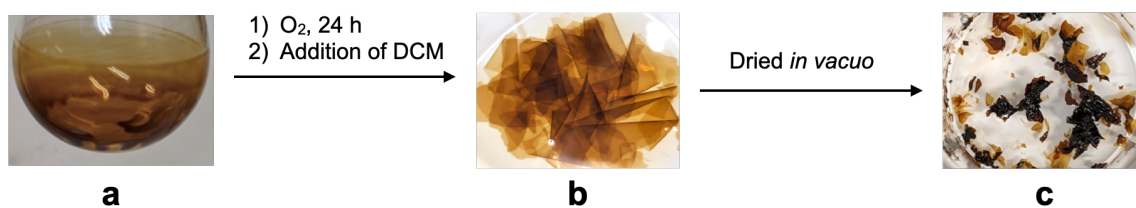

**Figure S2.** Photographs of thinly deposited precursor **2** on the glass surface of a round-bottom flask by evaporation (a), film **3** soaked in dichloromethane (b) and curled film **3** after dried *in vacuo*.

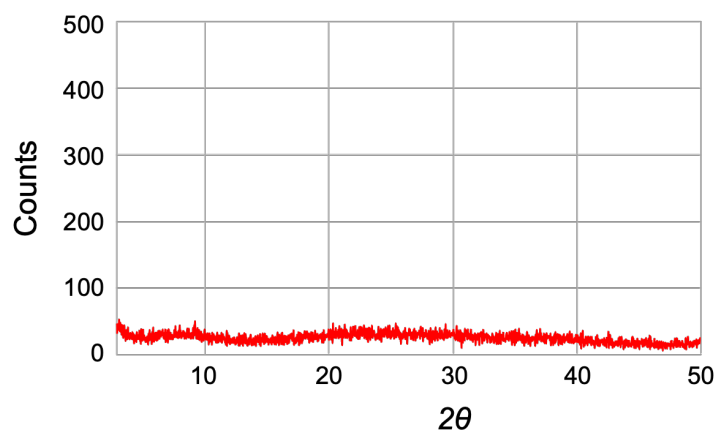

**Figure S3.** Powder X-ray diffraction profile of Au<sub>25</sub> cluster film (**3**).

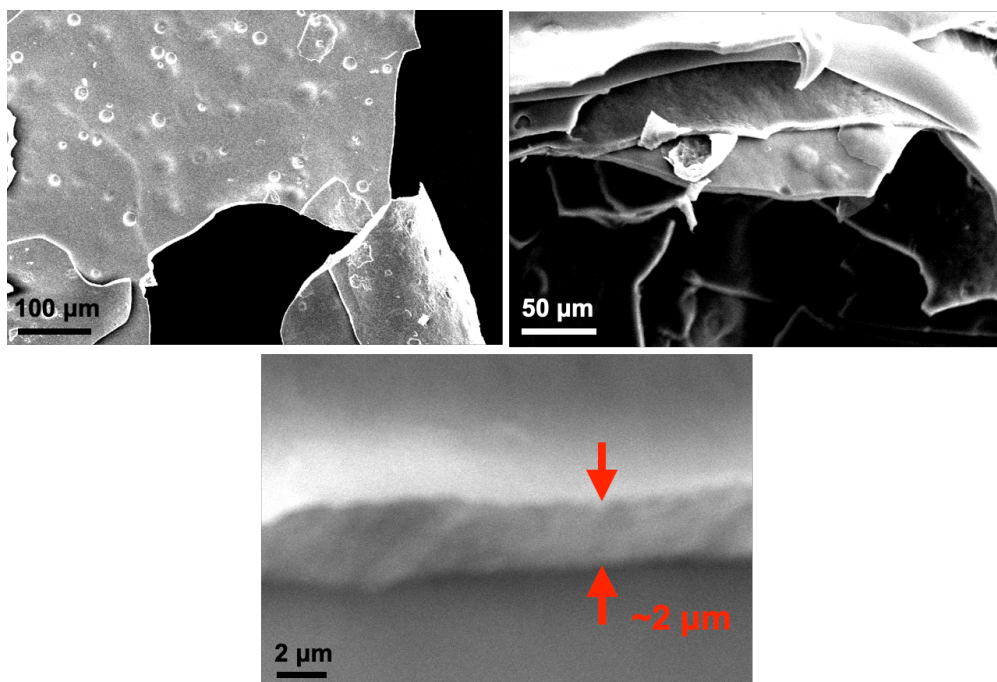

**Figure S4.** SEM images of the Au<sub>25</sub> cluster film **3**.

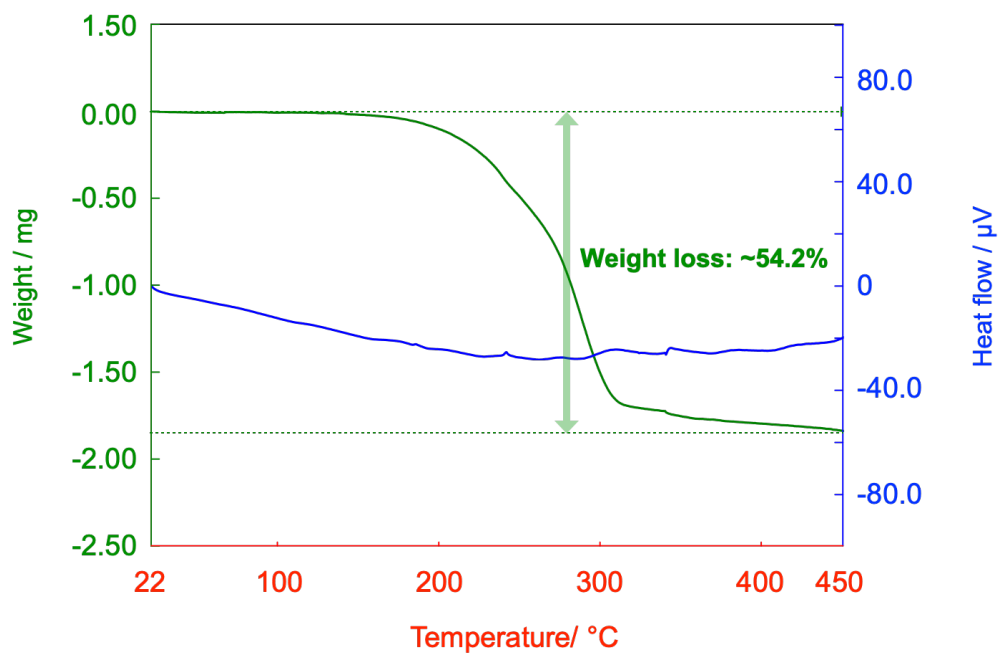

**Figure S5.** TG-DTA profile of Au<sub>25</sub> cluster film **3**. The weight loss expected from the chemical composition Au<sub>25</sub>(S<sub>2</sub>C<sub>6</sub>H<sub>12</sub>)<sub>36</sub>(N(C<sub>8</sub>H<sub>17</sub>)<sub>4</sub>)<sub>1.8</sub> is 55.6%.

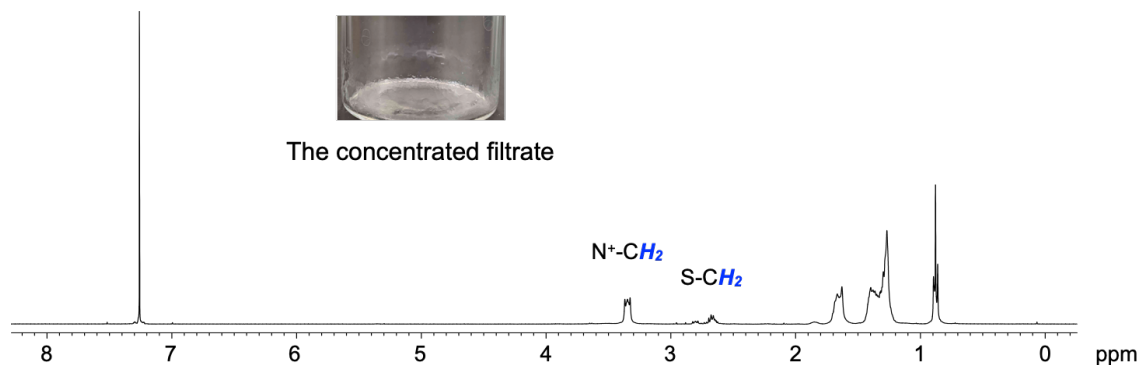

**Figure S6.**  $^1\text{H-NMR}$  spectrum ( $\text{CDCl}_3$ , 400 MHz, 298 K) of the filtrate when the film product (**3**) was isolated.

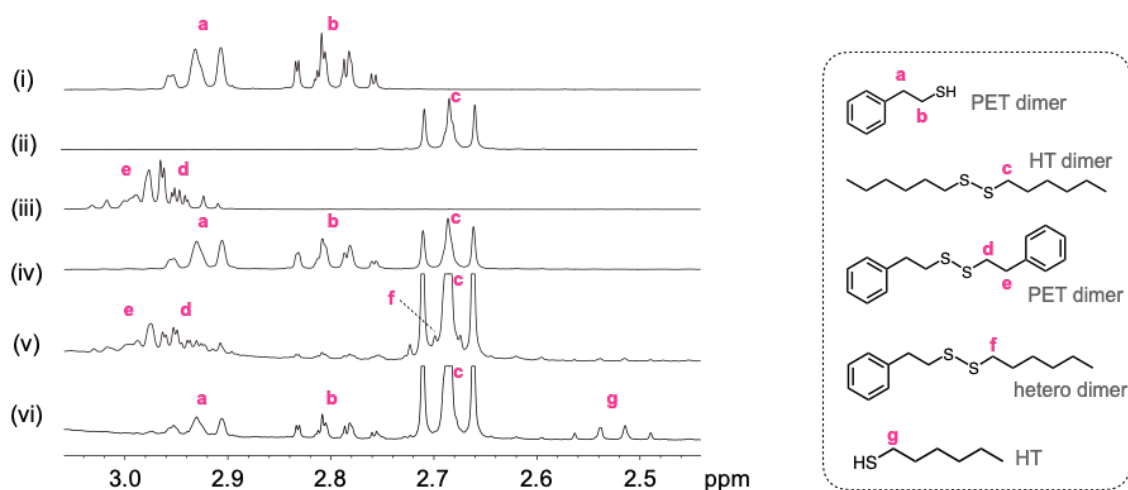

**Figure S7.**  $^1\text{H-NMR}$  spectra ( $\text{CDCl}_3$ , 300 MHz) of 2-phenylethanethiol (PET) (i), 1-hexanethiol (HT) dimer (ii), PET dimer (iii), and the reaction mixtures of PET and HT dimer (8.3 and 16  $\mu\text{mol}$ , respectively) under  $\text{O}_2$  in the absence (iv) and presence (v) of **1** (0.92  $\mu\text{mol}$ ), and under  $\text{N}_2$  in the presence of **1** (vi). For (iv)-(vi), neat substrates were treated under the designated conditions without solvent (semi-solid conditions) at 20  $^\circ\text{C}$ , and after 46 h, the mixtures were dissolved in  $\text{CDCl}_3$  and were immediately subjected to the  $^1\text{H NMR}$  and TLC analyses.



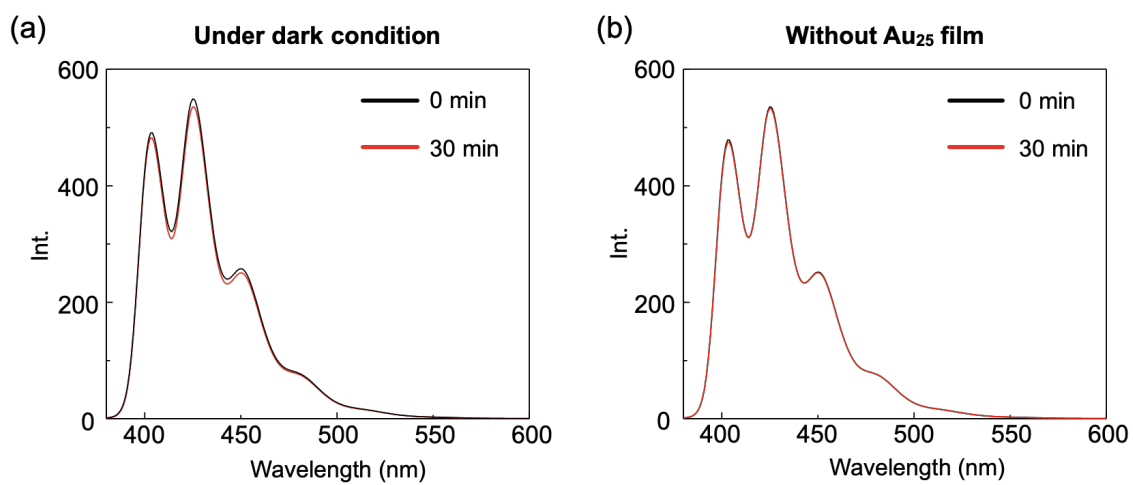

**Figure S8.** Photoluminescence spectra of DMA in methanol (a) with Au<sub>25</sub> cluster film **3** under dark condition and (b) without Au<sub>25</sub> film under irradiation at 520 nm.
